# Supplementary material
Source: PubMed Central journal article supplement (PMC6368856)
Supplement: NIHMS913114-supplement-1.pdf [file NIHMS913114-supplement-1.pdf]

Supplementary Material to  
**Longitudinal structural and functional differences between  
proportional and poor motor recovery after stroke**

*Adrian G. Guggisberg; Pierre Nicolo; Leonardo G. Cohen;*

*Armin Schnider; Ethan R. Buch*

**Supplementary Figure**

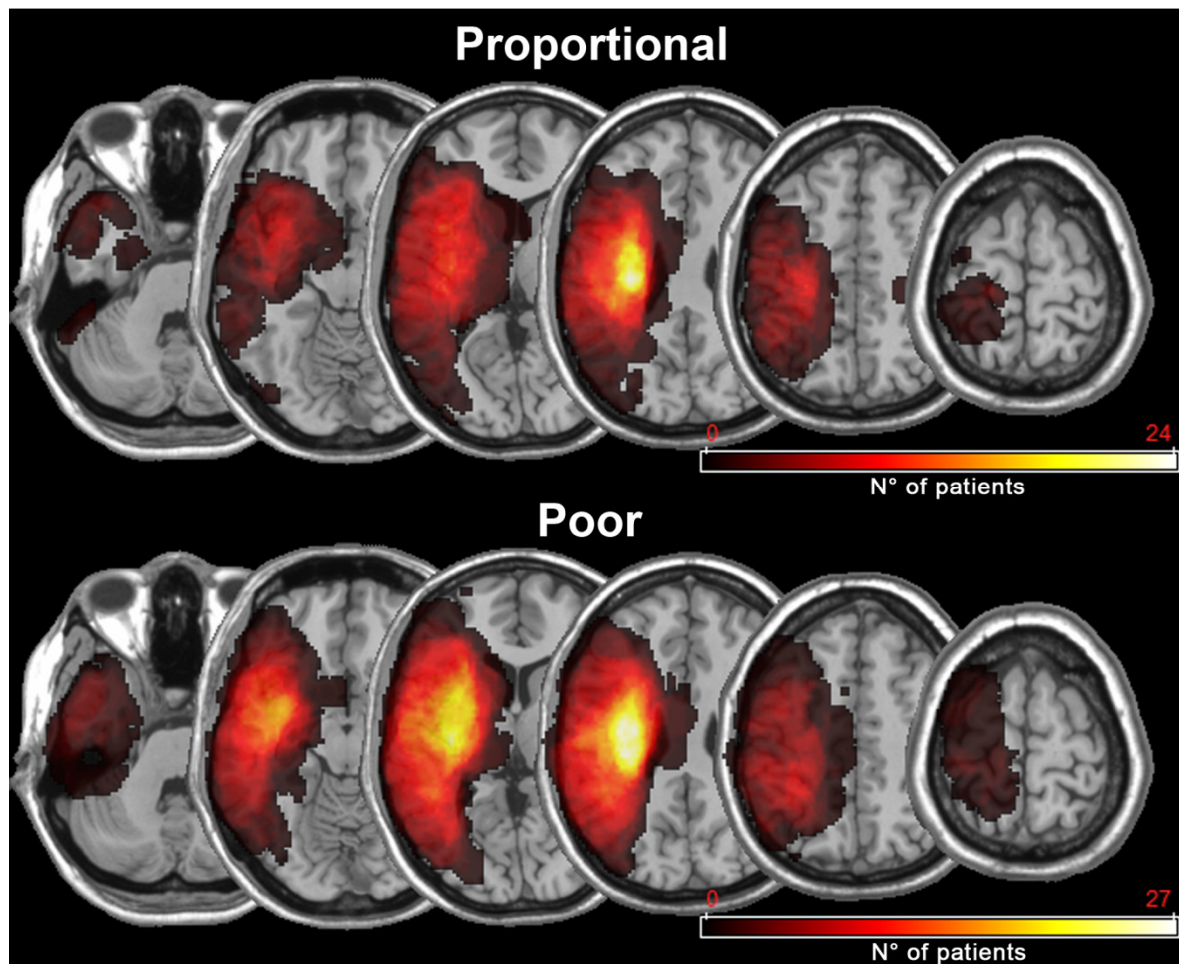

**Supplementary Figure 1. Lesion maps of the two recovery groups.** Colors represent the number of patients with a lesion at the given location. Lesions were aligned to the same side for visualization.

## Supplementary Table

**Supplementary Table 1. Patient characteristics.** Abbreviations: CNS, central nervous system; DVT, deep venous thrombosis; F, female; L, left; M, male; R, right; NIHSS, National Institute of Healthy Stroke Scale;

| Age | Gender | Admission NIHSS | Stroke Type | Lesion Side | Lesion Type         |
|-----|--------|-----------------|-------------|-------------|---------------------|
| 67  | M      | 13              | Ischemic    | R           | Cortico-subcortical |
| 65  | M      | 4               | Ischemic    | L           | Subcortical         |
| 60  | M      | 16              | Ischemic    | L           | Cortico-subcortical |
| 64  | F      | 7               | Ischemic    | L           | Cortico-subcortical |
| 80  | F      | 5               | Ischemic    | R           | Cortico-subcortical |
| 52  | F      | 11              | Ischemic    | R           | Cortico-subcortical |
| 68  | M      | 15              | Ischemic    | R           | Cortico-subcortical |
| 48  | F      | 27              | Ischemic    | L           | Subcortical         |
| 54  | F      | 6               | Ischemic    | L           | Subcortical         |
| 68  | M      | 16              | Ischemic    | R           | Cortico-subcortical |
| 37  | M      | 8               | Ischemic    | L           | Cortico-subcortical |
| 63  | M      | 12              | Ischemic    | L           | Subcortical         |
| 70  | F      | 14              | Ischemic    | L           | Cortico-subcortical |
| 53  | M      | 20              | Ischemic    | L           | Subcortical         |
| 79  | M      | 18              | Ischemic    | R           | Cortico-subcortical |
| 60  | M      | 18              | Ischemic    | R           | Cortico-subcortical |
| 73  | F      | 3               | Ischemic    | L           | Cortical            |
| 78  | F      | 9               | Ischemic    | R           | Subcortical         |

|    |   |    |             |   |                     |
|----|---|----|-------------|---|---------------------|
| 53 | M | 5  | Ischemic    | R | Cortico-subcortical |
| 56 | M | 19 | Ischemic    | L | Cortico-subcortical |
| 67 | F | 11 | Ischemic    | L | Cortico-subcortical |
| 43 | M | 18 | Ischemic    | L | Cortico-subcortical |
| 52 | M | 14 | Ischemic    | R | Subcortical         |
| 43 | F | 43 | Ischemic    | R | Cortico-subcortical |
| 65 | M | 19 | Ischemic    | L | Cortical            |
| 64 | F | 21 | Ischemic    | R | Cortico-subcortical |
| 32 | M | 3  | Ischemic    | L | Subcortical         |
| 67 | F | 8  | Ischemic    | L | Subcortical         |
| 77 | F | 22 | Ischemic    | L | Cortico-subcortical |
| 56 | M | 15 | Hemorrhagic | R | Subcortical         |
| 83 | M | 16 | Ischemic    | R | Cortical            |
| 80 | F | 10 | Ischemic    | R | Cortico-subcortical |
| 77 | M | 6  | Ischemic    | R | Cortical            |
| 77 | F | 17 | Ischemic    | R | Cortical            |
| 85 | F | 13 | Ischemic    | L | Cortical            |
| 51 | F | 7  | Ischemic    | L | Cortico-subcortical |
| 83 | M | 14 | Hemorrhagic | L | Subcortical         |
| 67 | M | 18 | Hemorrhagic | R | Subcortical         |
| 62 | M | 17 | Ischemic    | R | Cortico-subcortical |
| 49 | F | 16 | Ischemic    | R | Cortico-subcortical |
| 73 | M | 9  | Ischemic    | R | Cortico-subcortical |

|    |   |    |             |   |                     |
|----|---|----|-------------|---|---------------------|
| 70 | M | 10 | Ischemic    | L | Subcortical         |
| 61 | F | 12 | Ischemic    | R | Subcortical         |
| 62 | M | 11 | Ischemic    | R | Cortico-subcortical |
| 60 | M | 4  | Ischemic    | R | Cortico-subcortical |
| 74 | F | 21 | Ischemic    | L | Cortico-subcortical |
| 78 | M | 5  | Ischemic    | R | Subcortical         |
| 72 | M | 13 | Ischemic    | R | Cortico-subcortical |
| 58 | F | 24 | Ischemic    | L | Cortical            |
| 81 | F | 2  | Ischemic    | R | Subcortical         |
| 59 | M | 10 | Hemorrhagic | R | Subcortical         |
| 63 | M | 15 | Hemorrhagic | R | Cortical            |
| 75 | F | 17 | Ischemic    | R | Cortico-subcortical |
| 56 | M | 20 | Hemorrhagic | R | Subcortical         |
| 62 | F | 23 | Hemorrhagic | L | Cortico-subcortical |
| 51 | M | 5  | Ischemic    | R | Cortico-subcortical |
| 76 | F | 16 | Hemorrhagic | R | Subcortical         |
| 63 | M | 9  | Ischemic    | R | Cortico-subcortical |
| 69 | M | 3  | Ischemic    | R | Subcortical         |
| 68 | M | 14 | Ischemic    | R | Cortico-subcortical |
| 65 | F | 8  | Ischemic    | R | Subcortical         |
| 28 | F | 16 | Ischemic    | R | Cortico-subcortical |
